# Supplementary material for: Neuro-intestinal Acetylcholine Signalling Regulates the Mitochondrial Stress Response
Source: Research Square preprint supplement (doi:10.21203/rs.3.rs-4451841/v1), 2024-05-29
Supplement: Supplementary file 1 [file f97cc7224758265481977243.xlsx]

## Sheet: Fig. 1A
Whole intestinal fluorescence (AU)
hsp-6p::gfp
genotype	wild-type	cat-2(n4547)	tdc-1(n3420)	tph-1(mg280)	eat-4(ky5)	unc-25(e156)	cha-1(p1152)
									red = replicate 1
	1.11764	0.506486	0.924173	0.847878	0.802273	1.78799	0.229189		blue = replicate 2
									green = replicate 3
	0.922116	0.501498	0.899492	1.0502	1.30938	1.3644	0.286823
	0.968805	0.442701	0.7273	1.24526	1.37972	1.05152	0.20346
	1.0444	0.765461	0.595659	1.2854	1.07029	1.59349	0.194231
	1.22646	0.793244	0.815429	1.25221	1.01059	1.3711	0.137223
	0.890686	0.613563	0.697413	0.794104	0.607372	0.67687	0.194462
	1.04285	0.548351	1.06705	1.25823	0.698995	1.63143	0.19631
	1.25289	0.691366	0.712703	1.27791	1.14912	1.76011	0.130245
	0.595512	0.51224	0.734336	0.899031	1.39029	1.54082	0.120241
	0.938629	0.433686	0.879638	0.91539	0.966417	1.05474	0.165146
	1.19074	0.844456	1.12866	1.11614	1.63634	1.20748	0.172293
	0.957195	0.804674	0.844851	1.07708	1.17372	1.82132	0.125579
	0.86859	0.604512	1.37635	1.17224	0.78352	2.23575	0.157771
	0.978926	0.39149	0.988313	0.916516	1.37285	2.89142	0.211026
	0.994944	0.76487	1.00357	1.10812	1.34789	1.18876	0.241649
	0.64383	0.810984	0.802936	1.48228	1.58157	2.26824	0.138187
	0.989843	0.707153	0.957793	1.54615	1.53976	2.23417	0.271902
	1.22013	0.967667	0.812274	1.14249	1.18111	2.01232	0.22024
	1.08278	0.866839	1.24117	1.23425	0.616549	1.4593	0.133089
	1.07302	0.678884	0.733602	1.06979	1.27136	1.77248	0.262982
	1.1136	0.913594	1.41969	0.837605	0.914178	0.871793	0.158161
	1.13177	1.14467	0.982183	0.997099	0.38722	1.652	0.136963
	0.951068	0.822057	1.46657	0.970486	0.697219	1.39232	0.198486
	1.01217	0.884108	1.49901	0.935632	0.312647	1.79212	0.396687
	1.01769	0.585034	1.59105	0.926059	0.612483	2.26635	0.132399
	1.08899	0.874306	1.61398	0.789587	0.975172	2.4261	0.277193
	1.13123	0.416872	0.575342	0.706743	0.587474	1.63808	0.460287
	0.817581	1.49938	1.38356	0.860074	0.58101	2.24433	0.333772
	0.759441	0.7838	1.05537	1.20536	0.530545	2.05882	0.353793
	0.976458	0.85016	1.29062	0.711907	0.510138	2.58669	0.194683
Total n	30	30	30	30	30	30	30
Mean	1	0.7341	1.027	1.054	0.9666	1.728	0.2145

## Sheet: Fig. 1E
Whole intestinal fluorescence (AU)
hsp-6p::gfp
genotype	wild-type	unc-47(n2409)		wild-type	unc-25(e156)	unc-25(e156); unc-25p::unc-25 DNA #1	unc-25(e156); unc-25p::unc-25 DNA #2		wild-type	unc-25(e156)	unc-25(e156); unc-30p::unc-25 DNA #1	unc-25(e156); unc-30p::unc-25 DNA #2		wild-type	unc-25(e156)	unc-25(e156); unc-47ptruncated::unc-25 DNA #1	unc-25(e156); unc-47ptruncated::unc-25 DNA #2
																					red = replicate 1
	1.15549	1.34773		0.982853	1.306	1.20923	0.919768		0.982853	1.306	0.419512	0.834948		0.98333	2.49902	1.45297	1.39305				blue = replicate 2
																					green = replicate 3
	1.06079	0.977294		1.06887	2.04146	1.36326	1.201		1.06887	2.04146	0.828697	0.738796		1.26404	1.63737	0.999447	1.56198
	0.501187	1.26767		0.630702	1.98178	0.893602	0.695216		0.630702	1.98178	0.686321	0.62441		0.714414	1.5295	1.0593	1.08069
	0.747674	1.58559		1.44781	1.81285	0.997449	1.01232		1.44781	1.81285	0.718438	0.779424		0.950731	1.72335	1.45665	1.69243
	0.980692	1.30118		0.731861	1.92215	1.29703	0.678918		0.731861	1.92215	1.00026	0.598878		0.840929	1.28117	1.19797	1.61539
	1.2815	1.86406		0.817762	1.67275	0.777208	1.2747		0.817762	1.67275	0.900514	1.1423		1.05138	1.75748	1.20925	1.49985
	1.33846	2.04028		1.08026	1.98795	1.28667	0.488957		1.08026	1.98795	1.24828	0.651603		1.14	1.78586	1.09623	1.76248
	0.858193	1.05933		1.01557	1.57419	0.746836	0.628241		1.01557	1.57419	1.12646	0.881828		1.13332	1.57671	1.15923	1.45992
	1.08928	1.06432		0.971746	1.88398	1.07911	0.645225		0.971746	1.88398	1.27983	0.831511		0.915745	2.19444	0.974197	1.81947
	0.986737	1.06639		1.25256	1.68688	0.930782	1.14568		1.25256	1.68688	1.03857	0.62932		1.00612	1.34074	1.21518	1.46475
	0.870118	1.8131		1.15803	1.22105	1.23197	0.64657		1.15803	1.22105	1.14011	0.988023		0.739837	1.35727	2.84003	1.60131
	1.45942	0.983519		1.42337	1.44714	0.9102	0.608673		1.42337	1.44714	0.537184	0.326294		0.709222	1.81145	1.9076	2.46702
	0.862496	1.57394		1.39004	2.47676	0.951209	0.874611		1.39004	2.47676	0.680264	0.645164		1.27558	1.29023	1.58698	1.77488
	0.693165	1.48149		0.963379	1.97738	1.07482	0.523065		0.963379	1.97738	1.46141	0.716204		0.997766	1.59831	1.05764	1.46052
	1.41536	1.81538		0.818017	1.48549	0.846094	0.94368		0.818017	1.48549	1.01429	0.614177		1.11456	1.8356	1.74626	1.80588
	0.946137	1.17992		0.625873	1.78702	1.77579	1.23061		0.625873	1.78702	1.5784	0.984223		1.14336	1.91539	1.68956	1.83574
	1.10689	1.58946		1.06801	1.40518	0.828241	0.528963		1.06801	1.40518	0.99616	0.589129		0.769436	1.55149	1.67993	1.42853
	1.08965	1.63706		0.794652	1.48276	0.876799	0.902199		0.794652	1.48276	1.20298	0.810064		1.5004	1.32554	1.53414	1.21143
	0.877866	1.61124		0.928207	1.23397	0.454121	0.638837		0.928207	1.23397	0.901458	1.25353		0.915762	1.83262	1.83954	2.14871
	0.678896	1.78502		0.830434	1.59586	0.552034	0.919227		0.830434	1.59586	0.853683	0.95384		0.834087	2.41124	1.70071	2.44975
	0.954081	1.95481		1.18981	1.30241	0.809905	0.798293		1.18981	1.30241	0.725965	0.707258		0.758793	1.25639	1.11134	1.30984
	1.14971	2.31194		0.684919	1.5382	0.678099	0.895205		0.684919	1.5382	1.14136	1.18329		0.958261	1.53337	1.25067	1.68936
	1.18763	1.89266		0.933953	1.34604	0.832294	0.851694		0.933953	1.34604	0.740719	1.22536		0.721271	2.4438	1.67241	1.33344
	0.816509	1.49311		1.35745	1.61701	1.23884	0.92214		1.35745	1.61701	0.581369	1.19554		1.0122	2.06366	1.4161	2.30273
	0.88353	1.98504		1.02966	1.33842	0.834174	0.731939		1.02966	1.33842	1.05352	1.06766		1.10013	1.31786	1.0723	1.271
	1.07092	1.50333		1.24948	1.72619	0.668531	0.758651		1.24948	1.72619	1.37916	1.7133		0.499649	1.26248	1.59488	1.60906
	0.834427	1.64635		0.779487	1.90126	0.942904	1.37327		0.779487	1.90126	1.27298	1.87822		1.21768	1.24852	1.22501	1.15233
	1.25815	1.12408		0.709291	1.25817	0.822401	1.16769		0.709291	1.25817	1.27656	1.21505		0.865034	1.88981	1.48098	1.41443
	0.964315	1.6108		0.857217	1.78371	0.912314	1.63537		0.857217	1.78371	1.17738	0.858479		1.47166	1.06769	1.18413	1.95535
	0.880723	0.938931		1.20875	1.67552	1.13982	0.845479		1.20875	1.67552	1.92819	1.00034		1.39531	1.07584	1.23913	1.35903
Total n	30	30			30	30	30		30	30	30	30		30	30	30	30
Mean	1	1.51683		1	1.64899	0.965392	0.882873		1	1.64899	1.02967	0.921272		1	1.64714	1.42166	1.63101

## Sheet: Fig. 2B
Whole intestinal fluorescence (AU)
hsp-6p::gfp
genotype	wild-type	gbb-1(tm1406)	gbb-2(tm1165)	gbb-1(tm1406); gbb-2(tm1165)			wild-type	unc-49(e407)			wild-type	exp-1(ok1131)
															red = replicate 1
	0.923031	1.78919	1.76766	1.49764			0.722789	0.656495			0.907063	1.1676			blue = replicate 2
															green = replicate 3
	0.862645	1.38089	1.55019	1.42892			1.41406	1.0058			1.0232	1.17869
	1.04095	1.41802	1.50076	1.36784			0.683666	0.826107			0.742497	0.736686
	1.04708	1.22218	1.58416	0.864229			0.875324	0.879242			0.993605	0.542507
	0.869172	1.5311	1.79639	1.58037			0.852646	1.07274			0.947311	1.45103
	1.2358	1.12972	1.46687	2.44845			1.37764	1.10815			1.48371	0.819203
	0.907763	1.90156	1.36169	1.62759			0.879158	1.09636			0.634822	1.25724
	0.842358	1.70624	1.73278	1.16745			1.36962	0.899648			0.932129	0.968984
	1.13629	1.43	1.59115	1.47481			0.899645	0.777212			1.01611	0.828351
	1.13491	1.26646	1.14744	1.45244			0.925453	1.11778			1.31956	0.982605
	0.896278	1.09181	1.20895	0.904405			0.812681	1.09079			0.906953	0.527956
	0.817214	1.23626	1.11945	1.21957			0.856185	0.849338			0.793949	0.925609
	0.968217	1.6782	1.23807	2.12386			0.916274	0.84208			0.857214	0.787485
	1.15227	1.18062	1.18837	0.878295			0.705026	1.44024			1.05933	0.738864
	1.18357	1.33965	1.24856	1.15657			0.839405	1.27362			0.981033	1.48917
	1.10336	1.23837	1.37806	1.12455			1.21402	1.06175			1.54937	0.904946
	0.898177	1.07	1.22208	2.18223			0.86025	1.07691			0.967677	0.883501
	1.11249	0.9254	1.36988	2.02648			1.0847	1.29216			0.866879	1.52973
	0.996875	1.33839	1.49177	1.61509			0.995728	0.953334			0.827451	1.47359
	0.871548	1.19262	1.16647	1.4644			1.71573	1.18218			1.19014	0.71912
	0.925285	1.89454	1.34306	0.973533			0.846439	0.889538			0.674207	0.955735
	1.08607	1.37592	1.04139	1.16388			1.11236	0.784591			1.02029	1.15222
	0.885665	1.7078	1.12392	1.67647			1.0726	1.17724			1.13312	1.00735
	1.27491	1.51866	1.38538	1.36499			0.794982	0.765588			0.795726	1.07708
	0.987381	1.76694	1.17646	1.08209			0.832973	0.969161			1.0284	1.33433
	0.999093	1.2381	1.77415	1.03699			1.04284	1.19873			1.21961	1.34515
	0.768543	1.29744	1.19428	1.44429			0.813825	1.03845			1.3222	1.00729
	1.00427	1.79363	1.39712	1.18262			1.16341	0.804538			1.16228	1.43412
	0.874915	1.31187	1.30006	1.3826			0.968881	1.0492			0.822245	1.01666
	1.19387	1.39676	1.1184	1.39993			1.3517	0.951809			0.821936	1.60547
Total n	30	30	30	30			30	30			30	30
Mean	1	1.412	1.366	1.41			1	1.004			1	1.062

## Sheet: Fig. 2D
Whole intestinal fluorescence (AU)
hsp-6p::gfp
genotype	wild-type	gbb-1(tm1406)	gbb-2(tm1165)	gbb-2(tm1165); gbb-1(tm1406)	unc-25(e156)	unc-25(e156); gbb-1(tm1406)	unc-25(e156); gbb-2(tm1165)	unc-25(e156); gbb-2(tm1165); gbb-1(tm1406)			red = replicate 1
											blue = replicate 2
	1.1222	1.28891	2.38196	2.1376	2.07213	1.80299	1.84296	1.89421			green = replicate 3
	0.817771	1.37628	1.28072	1.79205	1.75865	1.99763	2.40346	1.56579
	1.08441	1.47207	1.35371	1.46315	2.11262	1.66773	2.13299	2.29792
	1.04694	1.72547	1.32679	1.26455	2.25448	2.41987	2.7299	1.22115
	0.965939	1.52133	1.35093	1.30439	1.26306	1.86276	1.06412	2.39785
	1.13812	1.34606	1.57349	1.48288	1.80974	1.02563	1.34288	1.94728
	0.954125	1.47108	1.40306	1.49408	1.59321	1.71481	2.01603	1.91387
	0.979806	1.63937	1.50521	1.1469	1.99204	1.98793	1.42555	2.21712
	1.0054	1.37898	1.52085	1.30817	1.58058	1.19726	0.881597	1.2866
	0.885292	1.59255	2.04322	1.48612	1.0119	1.35541	1.91667	2.31627
	1.07746	2.18532	1.8291	1.74151	2.657	1.75761	1.91715	1.9139
	0.582048	1.78272	1.57583	1.61016	1.77451	1.80621	2.81307	2.52118
	1.02206	1.47841	1.39042	1.19657	2.75966	1.76813	1.7234	1.40236
	1.31164	2.21704	1.97388	1.25705	2.2362	2.46588	1.81521	1.14455
	0.715043	1.10252	1.53949	1.7072	2.46991	1.06099	2.48763	1.75105
	0.858098	1.74993	1.75334	1.27759	2.57704	2.02229	1.96129	1.71508
	0.87964	1.36578	1.24043	1.35909	1.4924	2.22389	1.83283	2.13731
	0.750684	1.99282	1.80756	1.41344	1.73443	2.5747	2.3827	1.63111
	1.35109	1.34507	1.32441	1.70312	2.45462	1.79006	2.02871	2.34729
	1.45224	2.5052	2.18735	1.80729	1.98401	1.87844	2.81185	2.61483
	1.07272	1.21432	1.53154	0.988547	0.802613	1.78409	2.22954	2.43407
	0.919654	1.39865	1.33128	1.40924	2.17662	1.25243	1.71022	1.86539
	1.05815	1.57231	1.06456	2.14959	2.37956	1.92888	1.64202	2.38407
	1.21349	1.18922	1.45269	1.48738	1.49193	1.23976	1.82449	1.35581
	1.10474	1.57238	1.32786	1.67587	1.29737	1.45501	1.06807	1.12789
	0.630093	1.0164	1.06372	0.961733	1.27502	1.57141	1.76919	1.68319
	1.30983	1.23849	1.81257	1.95907	1.36824	1.73977	1.79872	1.58791
	0.91265	1.52824	1.32491	1.25465	2.37655	2.8039	1.76987	1.92472
	0.98286	2.0383	1.31846	1.25507	2.08238	1.78432	2.21136	1.45908
	0.795819	1.18965	1.17507	1.20264	2.77536	1.76076	1.19498	2.01683
Total n	30	30	30	30	30	30	30	30
Mean	1	1.54983	1.52548	1.47656	1.92046	1.79002	1.89161	1.86919

## Sheet: Fig. 2E
Whole intestinal fluorescence (AU)
hsp-6p::gfp
genotype	wild-type	gbb-1(tm1406)	gbb-1(tm1406); rgef-1p::gbb-1		wild-type	gbb-1(tm1406)	gbb-1(tm1406); acr-2p::gbb-1
	0.991274	1.23545	1.42557		0.938881	2.21286	0.976156		red = replicate 1
									blue = replicate 2
	0.893551	1.95471	1.07536		0.826335	2.10419	0.878382		green = replicate 3
	0.992965	1.63328	1.39874		1.46118	1.09393	1.74139
	1.38314	1.19705	1.13287		0.691724	1.52307	0.895098
	1.08933	1.18849	0.783993		1.07213	2.66257	0.752753
	0.895868	1.52487	1.47418		1.05093	1.46342	1.61468
	0.840242	1.10761	1.22149		1.27617	1.22425	0.803578
	0.928767	1.2597	0.661114		0.970639	1.3377	1.23908
	1.2925	1.10648	1.48639		0.884103	1.07732	1.58325
	0.692363	1.36649	1.31971		0.827901	2.21763	1.02249
	0.627587	1.39829	1.27326		1.02561	1.44525	0.668598
	1.00426	1.59487	1.4656		0.621885	2.13294	1.38996
	1.09256	2.03935	1.08264		0.863937	1.7978	0.808883
	0.867158	1.18424	1.15913		0.987051	1.26961	1.29645
	0.657544	1.7509	1.35264		1.02609	1.44634	0.870103
	1.49925	1.70738	1.04793		0.819662	1.11424	0.985327
	1.03806	1.95288	1.08864		1.30531	1.16903	0.959107
	1.07764	1.6634	1.48853		1.17534	1.17319	0.82903
	0.961459	0.982367	0.576051		1.35765	1.26966	0.81923
	1.17448	1.69308	1.04577		0.817456	1.66197	1.11593
	1.13812	1.34151	0.962544		0.796337	1.9789	1.16032
	1.13559	1.46804	1.10364		0.866362	2.04593	2.05224
	0.730781	1.96303	1.68301		0.866755	1.53126	0.854092
	1.169	2.24287	1.27377		1.04434	1.57444	2.55773
	1.11935	1.49978	1.52259		1.10419	1.91603	1.4135
	0.985505	1.70193	1.71294		0.751919	1.80846	1.90823
	0.878511	1.25531	1.67415		1.04027	1.54035	1.26024
	0.669542	1.84389	1.16147		1.11627	1.79053	1.20313
	1.1073	1.81819	0.920483		1.25945	2.22782	1.09299
	1.0663	1.8918	1.23907		1.1541	2.25255	1.63511
Total n	30	30	30		30	30	30
Mean	1	1.552	1.227		1	1.66878	1.2129

## Sheet: Fig. 3B
Whole intestinal fluorescence (AU)
hsp-6p::gfp
genotype	wild-type	unc-25(e156)	unc-17(e113)	unc-25(e156); unc-17(e113)		red = replicate 1
						blue = replicate 2
	0.80214	2.05514	0.7113	1.06919		green = replicate 3
	0.981472	1.71493	0.754661	0.53581
	1.39677	0.955203	0.775398	1.13637
	1.1041	2.03437	0.692316	0.678942
	0.991902	1.69629	0.587385	1.38222
	1.00067	1.29106	0.523533	0.988685
	0.986953	1.69803	0.39945	1.21824
	0.756331	1.98569	0.74194	1.15057
	1.0831	1.45598	0.64616	0.934066
	0.896569	0.950409	0.71728	1.18268
	0.96401	1.60299	0.694792	0.794291
	1.30145	1.63038	0.507215	0.720133
	0.898048	1.13942	0.483596	0.675999
	1.13479	1.57208	0.352456	1.14884
	1.12633	1.16491	0.437671	0.725055
	1.29902	1.67608	0.88228	0.98741
	0.731726	1.89838	0.631948	1.40472
	0.636814	1.73843	1.14017	0.875417
	1.00243	2.43912	0.827335	1.10432
	0.905387	1.23623	0.599992	1.001
	0.935309	2.38101	0.953636	1.47235
	1.07942	1.67114	0.858543	1.09393
	1.22197	2.23833	0.419307	0.768858
	0.842476	1.33586	0.805172	0.741673
	0.988786	2.32263	0.739993	0.947468
	0.824202	1.53802	1.18603	1.03551
	1.05136	2.34891	1.10303	1.03179
	0.951489	1.48967	0.918988	0.518739
	1.03348	1.90647	0.667915	0.613689
	1.07151	1.92527	0.833766	0.925778
Total n	30	30	30	30
Mean	1	1.70308	0.719775	0.962124

## Sheet: Fig. 3D
Whole intestinal fluorescence (AU)
hsp-6p::gfp
genotype	wild-type	ace-2(p72); ace-1(p1000)
	0.836966	2.68237		red = replicate 1
				blue = replicate 2
	0.750894	2.75622		green = replicate 3
	0.997934	2.0298
	0.979285	1.39132
	0.778022	1.92045
	0.927363	2.17991
	0.977771	2.04445
	1.33564	1.82971
	1.22262	2.01811
	1.19351	1.90728
	1.29837	1.17263
	1.05508	1.8601
	0.879137	2.26289
	1.15712	2.58528
	1.19658	2.92855
	0.905866	1.55721
	0.869915	2.15094
	0.82108	2.67777
	0.799313	2.1335
	1.01753	1.68476
	1.09424	1.80921
	1.31334	2.10531
	0.778767	2.54326
	1.14182	1.85632
	1.0191	2.66416
	1.09062	2.76228
	0.835218	1.83497
	0.663433	1.97703
	1.23756	3.28156
	0.825909	1.786
Total n	30	30
Mean	1	2.146

## Sheet: Fig. 3F
Whole intestinal fluorescence (AU)
hsp-6p::gfp
genotype	wild-type	ace-2(p72); ace-1(p1000)	wild-type	ace-2(p72); ace-1(p1000)	wild-type	ace-2(p72); ace-1(p1000)	wild-type	ace-2(p72); ace-1(p1000)
RNAi vector	EV	EV	acr-6	acr-6	acr-7	acr-7	acr-11	acr-11
	0.94031	1.79806	1.44053	1.44145	1.18426	1.75705	0.889083	1.31652		red = replicate 1
										blue = replicate 2
	0.756813	1.13979	1.28331	1.83834	0.818906	2.11715	0.812191	0.925437		green = replicate 3
	1.02275	2.40687	1.08551	1.53161	0.798749	1.52098	1.16231	0.86765
	0.939845	1.51599	1.24784	1.51115	0.940146	1.48339	1.20245	0.86127
	0.603149	1.46856	1.0551	1.90698	0.693414	1.20206	0.699924	1.28884
	1.00334	1.30283	1.3742	1.62666	1.06431	1.73976	0.894937	1.34203
	1.38316	1.99787	1.02271	1.14463	0.649222	1.91016	1.3834	0.736134
	1.22146	1.59266	0.74652	1.65989	1.42688	2.76116	1.0519	1.10712
	0.915378	1.60215	0.980384	1.40241	1.29221	1.65503	1.28661	1.86615
	1.2138	1.55076	1.15193	2.19018	1.15588	2.16917	0.961301	1.43866
	0.77309	2.96507	0.982774	1.24252	0.854329	1.22197	1.07835	1.2654
	1.35318	1.68117	0.607289	1.23645	0.646438	1.00317	0.888304	1.09751
	0.846689	2.49284	0.866935	0.86995	1.24818	1.30009	1.31174	1.48581
	1.02985	2.53488	1.00597	1.02451	1.11433	1.15954	1.69449	1.42427
	0.808494	1.879	0.845347	0.999171	0.892557	1.26952	1.58424	1.04206
	0.928867	1.42495	0.961302	1.32183	1.34176	1.49674	1.32552	1.20039
	1.24705	1.73059	0.833191	0.836932	0.801319	1.40362	0.979199	0.904177
	1.21206	3.03764	0.995468	2.90942	0.962852	2.10192	1.17361	1.6757
	0.817582	1.99694	1.0861	1.36144	0.872897	1.2588	0.838784	1.14691
	0.983129	2.45619	0.789473	1.03306	1.27166	1.21565	0.974001	1.02531
	0.704665	0.797009	0.943485	0.906903	0.756164	0.826186	0.963268	0.585986
	0.988268	1.16594	0.661726	0.86501	0.654622	1.55359	0.690375	0.680339
	1.17595	1.21718	1.06625	0.738589	0.765037	1.34212	0.697623	1.14012
	0.849759	1.54137	0.816541	1.89149	0.936866	0.957911	0.773972	0.908184
	1.03576	1.3761	1.20921	1.18097	0.865405	0.628875	0.667388	0.988847
	1.24396	1.38302	0.902667	0.997813	1.55013	1.60135	1.11071	1.01898
	0.975811	1.21175	0.821209	1.58586	0.87744	1.27278	0.772189	0.916186
	1.1228	1.60205	1.20271	0.985572	1.15134	0.94699	1.38749	0.922572
	1.20197	1.42807	0.767261	0.889642	0.902886	0.93856	1.42876	0.92785
	0.701062	1.48681	1.60588	1.15427	0.864276	0.829464	1.18258	1.11193
Total n	30	30	30	30	30	30	30	30
Mean	1	1.726	1.012	1.343	0.9785	1.421	1.062	1.107

## Sheet: Fig. 3G
Whole intestinal fluorescence (AU)
hsp-6p::gfp
genotype	wild-type	unc-25(e156)	wild-type	unc-25(e156)
RNAi vector	EV	EV	acr-11	acr-11
	0.704665	1.13949	0.963268	0.734262		red = replicate 1
						blue = replicate 2
	0.988268	0.995679	0.690375	0.594243		green = replicate 3
	1.17595	0.978554	0.697623	0.805612
	0.849759	2.11687	0.773972	0.831281
	1.03576	1.57875	0.667388	0.763388
	1.24396	1.03408	1.11071	1.16079
	0.975811	1.16822	0.772189	0.972633
	1.1228	2.32966	1.38749	0.748181
	1.20197	1.84705	1.42876	0.813597
	0.701062	1.35744	1.18258	0.628786
	0.875244	1.47753	1.37821	0.993615
	0.745222	1.32419	1.16026	0.961237
	1.11683	1.06721	1.0425	1.14239
	1.05977	1.11323	1.03961	0.903906
	0.955166	1.2885	1.19194	0.804969
	1.2602	1.80334	1.00995	1.23791
	0.861166	1.18127	1.36466	1.05012
	0.989235	1.3901	1.04895	1.24404
	1.13599	1.30405	0.982394	0.915488
	1.00118	1.4614	1.11884	0.888139
	1.11631	1.20103	0.68942	1.07593
	0.894861	1.02076	0.967187	0.618538
	1.03172	1.29655	0.586164	0.769204
	0.907674	1.32867	0.936351	0.72972
	1.08581	0.798314	0.509292	1.45336
	1.29894	1.09048	0.78952	0.583271
	1.12854	0.930714	1.01119	1.01811
	1.19797	1.55364	0.910778	0.731181
	0.728755	1.17117	0.714238	0.939989
	0.609418	1.12992	0.780948	1.13651
Total n	30	30	30	30
Mean	1	1.316	0.9636	0.9083

## Sheet: Fig. 4B
Whole intestinal fluorescence (AU)
hsp-6p::gfp
genotype	wild-type	acr-11(rp191)	ace-2(p72); ace-1(p1000)	ace-2(p72) acr-11(rp192); ace-1(p1000)
	0.95423	1.21284	1.27275	0.71638			red = replicate 1
							blue = replicate 2
	0.952743	1.3273	1.82314	1.50285			green = replicate 3
	1.20094	0.912669	1.21841	0.75379
	1.20688	0.755811	1.89795	0.843871
	0.879975	0.72713	1.75473	1.53649
	1.02952	1.01747	1.80159	0.984691
	1.21081	1.42127	1.44959	1.09598
	0.725233	1.02194	1.50637	0.741609
	0.819139	0.869998	1.43606	0.823576
	1.02052	0.735415	1.30945	1.07497
	0.906098	1.04259	1.38175	0.868314
	1.02395	1.24922	2.25997	0.856107
	1.02323	1.22758	1.44188	0.789791
	0.803735	1.36134	1.07006	0.875878
	0.956266	1.01819	1.32591	1.00875
	1.02677	1.21245	1.10364	0.954352
	1.05888	1.35426	2.00904	1.49487
	0.929683	0.843971	2.45994	1.14966
	1.0852	1.21015	2.46092	1.21102
	1.18619	1.65211	2.21506	1.22343
	1.13481	0.859984	1.07438	0.521696
	0.832232	0.978376	2.77874	0.606569
	0.716047	0.902579	1.17688	0.765321
	0.902745	1.31119	2.00918	0.880104
	0.895724	1.18731	1.42386	0.711003
	0.701018	1.6337	1.26097	0.843039
	1.18541	1.16264	1.48618	0.61765
	1.67719	1.11868	1.75323	1.01185
	0.690854	0.963251	1.25072	0.988529
	1.26398	1.02258	2.86215	0.961325
Total n	30	30	30	30
Mean	1	1.11	1.676	0.9471

[truncated: 25 more sheets: Fig. 4C, Fig. 4D, Fig. 4F, Fig. 5A, Fig. 5C, Fig. 5D, Fig. 5E, Fig. 5F, Fig. 5G, Fig. 5H, Fig. S1A, Fig. S1C, Fig. S1E, Fig. S1G, Fig. S1H, Fig. S1I, Fig. S1K, Fig. S2A, Fig. S2B, Fig. S3A …]
